# Supplementary material for: Use of long-term stable CsPbBr3 perovskite quantum dots in phospho-silicate glass for highly efficient white LEDs
Source: Royal Society of Chemistry journal article supplement (doi:10.1039/c7cc06486a), 2017-01-01
Supplement: c7cc06486a1.pdf [file c7cc06486a1.pdf]

## Supporting Information

### Use of long-term stable CsPbBr<sub>3</sub> perovskite quantum dots in phospho-silicate glass for highly efficient white LEDs

Xiaoxuan Di<sup>a</sup>, Zemin Hu<sup>a</sup>, Jutao Jiang<sup>a</sup>, Meiling He<sup>a</sup>, Lei Zhou<sup>a</sup>, Weidong Xiang<sup>\*a</sup> and

Xiaojuan Liang<sup>\*a</sup>

<sup>a</sup>College of Chemistry and Materials Engineering, Wenzhou University, Wenzhou 325035, China.

E-mail: [xiangweidong001@126.com](mailto:xiangweidong001@126.com) [lxj6126@126.com](mailto:lxj6126@126.com)

## Experimental Section

### Materials and chemicals

Lead bromide (PbBr<sub>2</sub>, 99%), caesium carbonate (Cs<sub>2</sub>CO<sub>3</sub>, 99%), sodium bromide (NaBr, 99%), phosphorus pentoxide (P<sub>2</sub>O<sub>5</sub>, 98%), silicon dioxide (SiO<sub>2</sub>, 99%) and zinc oxide (ZnO, 99%) were purchased from Aladdin. CaAlSiN<sub>3</sub>:Eu<sup>2+</sup> red phosphor was purchased from HangZhou YingHe Photoelectron Materials Co. Ltd. All chemicals were used without further purification.

### Preparation of CsPbBr<sub>3</sub> QDs glass

Highly efficient green emitting CsPbBr<sub>3</sub> QDs glasses were produced with the following method. Glass specimens with the nominal compositions (mol%) of 50P<sub>2</sub>O<sub>5</sub>-25SiO<sub>2</sub>-3ZnO-4PbBr<sub>2</sub>-9NaBr - 9Cs<sub>2</sub>CO<sub>3</sub> were prepared by conventional melt-quenching. The raw chemicals were melted in an alumina crucible at 1100 °C for 10 min; the obtained melt was poured into a preheated copper mold and annealed in a furnace slightly below the glass transition temperature (T<sub>g</sub>) for 3 h. Finally, the prepared glasses were cut into small species with a size of 10×10×1 mm for the heat treatment. CsPbBr<sub>3</sub> QDs were formed in the specimens upon the thermal treatment at a temperature determined from the thermal analysis results.

### Construction of WLEDs

To fabricate the WLEDs, a simple spin-coating method was used to deposit a commercial red-emitting CaAlSiN<sub>3</sub>:Eu<sup>2+</sup> phosphor embedded epoxy resin film on the upper surface of the as-prepared CsPbBr<sub>3</sub> QDs glass (heat-treated at 450 °C for 10 h). A drying treatment was performed in vacuum to solidify the film and eliminate the air in the film. Ultimately, the obtained color converter was coupled with a commercial blue GaN chip to construct a remote type WLED.

## **Characterizations**

The structure and phase purity of the CsPbBr<sub>3</sub> QDs glass were confirmed by using X-ray diffraction (XRD, D8 Advance, Bruker, Germany) with Cu K $\alpha$  radiation at 40 kV and 40 mA. The microstructure of the sample was investigated using an FEI Tecnai F20 transmission electron microscope (TEM) and a high-resolution TEM (HRTEM). The photoluminescence (PL), PL quantum efficiency (QY) and temperature-dependent emission spectra of the samples were collected using a spectrofluorometer (Edinburgh, FS5), which was equipped with both continuous (150 W) and pulsed xenon lamps. Finally, the optical properties of the WLEDs, such as the luminous efficacy (LE), chromaticity coordinates, color rendering index (CRI), and correlated color temperature (CCT), were measured using an integrating sphere (PMS-50, Everfine, China) with a forward current of 20 mA.

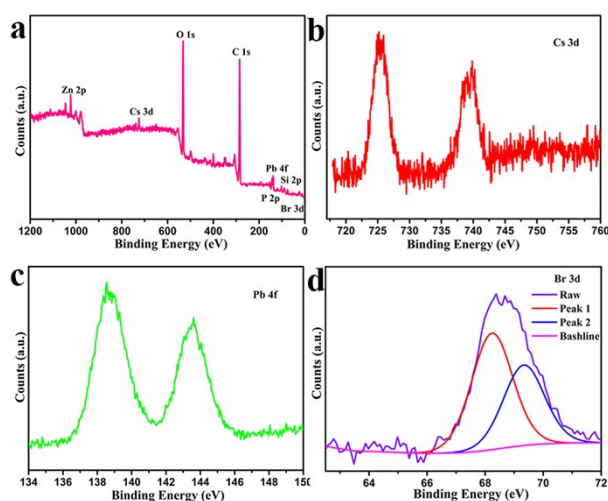

Fig. S1 (a) XPS spectra of CsPbBr<sub>3</sub> QDs glass and high resolution spectra of (b) Cs 3d, (c) Pb 4f, (d) Br 3d.

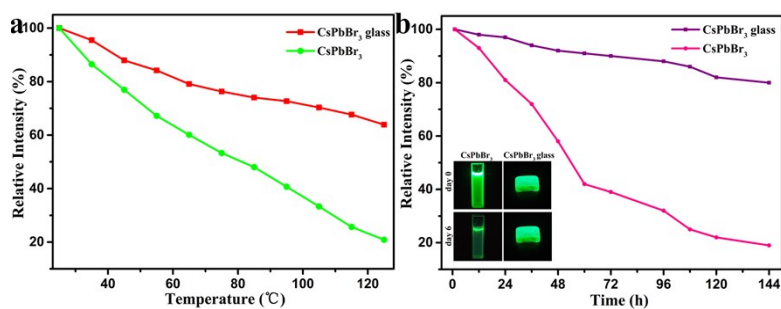

Fig. S2 (a) Thermal stability test of the CsPbBr<sub>3</sub> QDs glass and pure CsPbBr<sub>3</sub> QDs. (b) Photostability test of the CsPbBr<sub>3</sub> QDs glass and pure CsPbBr<sub>3</sub> QDs; inset shows digital photos of the pure CsPbBr<sub>3</sub> QDs and CsPbBr<sub>3</sub> QDs glass under UV (365 nm) illumination after exposed to ambient air.

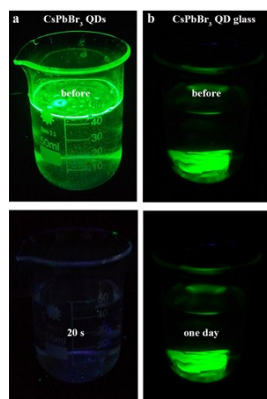

Fig. S3 CsPbBr<sub>3</sub> QDs and CsPbBr<sub>3</sub> QDs glass before and after immersion in an aqueous solution.

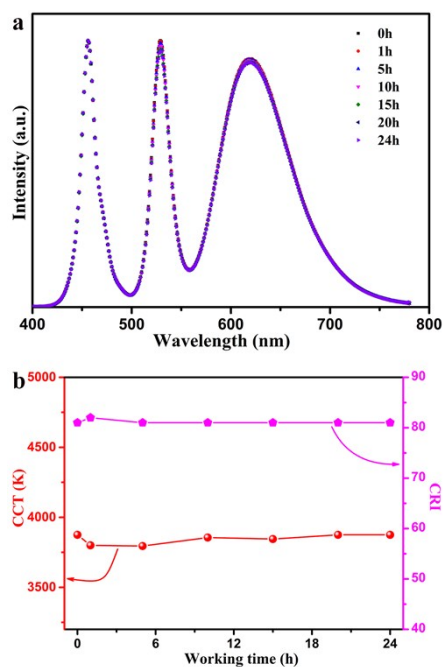

Fig. S4 (a) EL spectra of the WLED in different working time intervals. (b) Related CCT and CRI as a function of the working time.

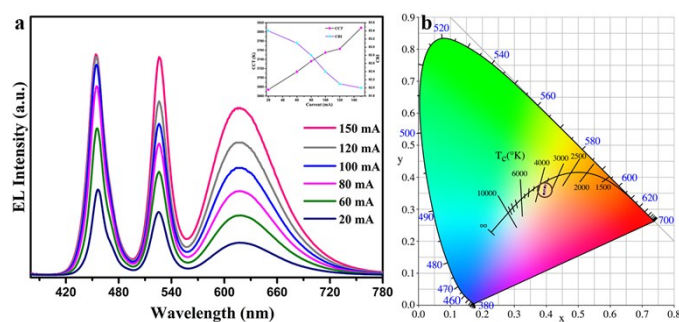

Fig. S5 (a) EL spectra of the fabricated WLED at various operational currents (20-150 mA); the inset shows the CCT and CRI at different currents. (b) The corresponding colour coordinates of the WLED in a CIE diagram.

Table. S1 Parameter comparisons of the as-prepared QDs glass and the reported QDs by the other approaches.

|             | Preparation methods | QY (%) | Particle size (nm) | Dispersion | Photo-stability | Thermal stability | Ref.      |
|-------------|---------------------|--------|--------------------|------------|-----------------|-------------------|-----------|
| QDs glasses | Heat-treatment      | 42     | 3.2                | Glass      | > 2 months      | High              | This work |
|             | Hot injection       | >80    | 4-15               | Hexane     | < 6 days        | Low               | [21]      |
| QDs         | Room temperature    | >80    | 7.8                | Hexane     | -               | Low               | [36]      |

Table. S2 Optical parameters of the as-constructed WLED at an operating current of 20 mA.

|                 | $\Phi_v$ (lm) | CRI  | CCT (K) | LE (lm/W) |
|-----------------|---------------|------|---------|-----------|
| QDs glass+CASNE | 2733          | 83.4 | 3815    | 50.5      |
